# Supplementary material for: Pre‐ and Post‐Transfusion Alloimmunization in Dogs Characterized by 2 Antiglobulin‐Enhanced Cross‐match Tests
Source: PubMed Central journal article supplement — J Vet Intern Med. 2017 Aug 14;31(5):1420–9. doi: 10.1111/jvim.14801 (PMC5598901; doi:10.1111/jvim.14801), 2017-08-14
Supplement: JVIM-31-1420-s001.pdf [file JVIM-31-1420-s001.pdf]

**Supplemental Table 1.** Signalment and cause of anemia of 26 recipient dogs.

| Recipient # | Breed                 | Gender | Age (years) | Cause of anemia                  |      |
|-------------|-----------------------|--------|-------------|----------------------------------|------|
| R1          | Jack Russel           | FS     | 8           | Splenic hemangiosarcoma          | R,   |
| R2          | Poodle                | F      | 2           | Thoracic bite wounds             |      |
| R3          | Husky                 | M      | 10          | Splenic hemangiosarcoma          | reci |
| R4          | Boxer                 | M      | 7           | Splenic hemangiosarcoma          | pie  |
| R5          | Griffon               | F      | 0,8         | Traumatic hemoabdomen            |      |
| R6          | Staffordshire Terrier | FS     | 3           | Iron deficiency anemia           | nt;  |
| R7          | French Bulldog        | M      | 10          | DIC                              |      |
| R8          | Boxer                 | F      | 2           | Traumatic hemothorax             | M,   |
| R9          | Doberman              | F      | 7           | IMHA                             | mal  |
| R10         | Doberman              | M      | 3           | ITP                              |      |
| R11         | Cocker                | FS     | 4           | ACRs                             | e;   |
| R12         | Chihuahua             | F      | 3           | Myelodysplastic syndrome         |      |
| R13         | Akita Inu             | FS     | 1           | Traumatic hemoabdomen            | F,   |
| R14         | Bordeaux Mastiff      | FS     | 4           | ACRs                             | fem  |
| R15         | Chihuahua             | M      | 1           | IMHA                             |      |
| R16         | Standard Poodle       | FS     | 4           | GDV                              | ale; |
| R17         | Jack Russel           | M      | 2           | Gastrointestinal hemorrhage      |      |
| R18         | Bordeaux Mastiff      | M      | 2           | Retromandibular abscess          | MC   |
| R19         | Beagle                | F      | 0,7         | ACRs                             |      |
| R20         | Dachshund             | MC     | 10          | Thoracic bite wounds             | ,    |
| R21         | Poodle                | FS     | 15          | Splenic hemangioma               | mal  |
| R22         | Bernese Mountain Dog  | FS     | 5           | ACRs                             |      |
| R23         | Setter                | M      | 5           | ACRs                             | e    |
| R24         | Alaskan Malamute      | M      | 1           | Parvovirus infection             |      |
| R25         | Beagle                | MC     | 12          | Surgical bleeding                | cas  |
| R26         | Afghan Hound          | M      | 10          | Pulmonary carcinoma / hemothorax | trat |

ed; FS, female spayed

ACRs: anticoagulant rodenticides

DIC: disseminated intravascular coagulation

GDV: gastric dilatation-volvulus

IMHA: immune-mediated hemolytic anemia

ITP: immune-mediated thrombocytopenia

**Supplemental Table 2.** Dog Erythrocyte Antigen (DEA) 1 and DEA 7 typing and major crossmatch results of 26 recipient dogs pre- and post-transfusion with 29 donors totaling 32 transfusion events.

| #    | DEA blood type |       |       |       | Pre- and post-transfusion major crossmatch results |                           |                            |     |                    |     |                    |
|------|----------------|-------|-------|-------|----------------------------------------------------|---------------------------|----------------------------|-----|--------------------|-----|--------------------|
|      | Recipient      |       | Donor |       | Pre-transfusion                                    | 1 <sup>st</sup> follow-up | 2 <sup>nd</sup> follow-up  |     |                    |     |                    |
|      | DEA 1          | DEA 7 | DEA 1 | DEA 7 | results                                            | 11-22 days<br>(median 16) | 26-129 days<br>(median 39) | Day | Crossmatch results | Day | Crossmatch results |
| R1*  | -              | +     | -     | +     | -                                                  | ND                        | ND                         | 93  | -                  |     |                    |
| R2   | -              | ND    | -     | -     | -                                                  | ND                        | ND                         | 129 | -                  |     |                    |
| R3   | -              | ND    | -     | ND    | -                                                  | 19                        | -                          | 31  | -                  |     |                    |
|      |                |       | -     | -     | -                                                  | 19                        | -                          | 31  | -                  |     |                    |
| R4   | -              | +     | -     | +     | -                                                  | ND                        | ND                         | 115 | -                  |     |                    |
| R5   | -              | ND    | -     | ND    | -                                                  | ND                        | ND                         | 115 | -                  |     |                    |
| R6*  | -              | ND    | -     | -     | -                                                  | ND                        | ND                         | 79  | +                  |     |                    |
| R7*  | -              | -     | -     | -     | -                                                  | ND                        | ND                         | 106 | +                  |     |                    |
| R8   | -              | -     | -     | +     | -                                                  | ND                        | ND                         | 72  | +                  |     |                    |
| R9** | -              | ND    | 2+    | -     | -                                                  | ND                        | ND                         | 67  | +                  |     |                    |
| R10* | 1+             | -     | 3+    | +     | -                                                  | 12                        | -                          | 39  | +                  |     |                    |
| R11  | 1+             | ND    | 2+    | -     | -                                                  | ND                        | ND                         | 30  | -                  |     |                    |
| R12  | 1+             | +     | 1+    | -     | -                                                  | 22                        | -                          | 39  | -                  |     |                    |
| R13* | 2+             | -     | 1+    | +     | -                                                  | 19                        | +                          | 70  | +                  |     |                    |
|      |                |       | 2+    | +     | -                                                  | 16                        | +                          | 67  | +                  |     |                    |
| R14* | 2+             | +     | 3+    | +     | -                                                  | 13                        | -                          | 32  | +                  |     |                    |
| R15  | 2+             | -     | 1+    | +     | -                                                  | 15                        | +                          | 26  | +                  |     |                    |
| R16  | 2+             | -     | 1+    | -     | -                                                  | ND                        | ND                         | 42  | +                  |     |                    |
| R17* | 2+             | +     | 3+    | -     | -                                                  | ND                        | ND                         | 28  | +                  |     |                    |
|      |                |       | 2+    | -     | -                                                  | ND                        | ND                         | 26  | -                  |     |                    |
| R18  | 2+             | -     | 1+    | +     | -                                                  | ND                        | ND                         | 39  | -                  |     |                    |
|      |                |       | 2+    | -     | -                                                  | ND                        | ND                         | 39  | -                  |     |                    |
| R19  | 2+             | +     | 2+    | +     | -                                                  | 16                        | -                          | 58  | -                  |     |                    |
| R20  | 2+             | ND    | 3+    | +     | -                                                  | 16                        | -                          | 37  | -                  |     |                    |
| R21  | 2+             | ND    | 3+    | -     | -                                                  | ND                        | ND                         | 55  | -                  |     |                    |
| R22* | 3+             | ND    | -     | +     | -                                                  | 11                        | -                          | 31  | +                  |     |                    |
|      |                |       | 2+    | +     | -                                                  | 11                        | -                          | 31  | +                  |     |                    |
| R23  | 3+             | ND    | 2+    | -     | -                                                  | ND                        | ND                         | 37  | +                  |     |                    |
| R24  | 3+             | ND    | 3+    | -     | -                                                  | ND                        | ND                         | 80  | -                  |     |                    |
| R25  | 3+             | -     | 2+    | -     | -                                                  | 21                        | -                          | 35  | -                  |     |                    |
| R26  | 3+             | -     | 2+    | -     | -                                                  | ND                        | ND                         | 33  | -                  |     |                    |
|      |                |       | 3+    | -     | -                                                  | ND                        | ND                         | 33  | -                  |     |                    |

DEA, Dog Erythrocyte Antigen.

DEA 1 expression was classified as negative (MFI<10), weakly positive (10≤MFI<100), moderately positive (100≤MFI<300), and strongly positive (MFI≥300)

Typing results: -, negative; +, positive; ND, not determined

1+, weakly *DEA 1+*; 2+, moderately *DEA 1+*; 3+, strongly *DEA 1+*

Crossmatch results: -, compatible; +, incompatible; ND, not determined

\* Recipients which were used for the screening of alloantibodies with the panel RBCs

\*\* Dog that had received accidentally *DEA 1* mismatched blood

**Supplemental Table 3.** *Dog Erythrocyte Antigen (DEA) 1 and DEA 7 mismatched transfused recipient dogs pre- and post-transfusion.*

| Recipient | Donor                   | Pre- and post-transfusion major crossmatch results |                           |                           |
|-----------|-------------------------|----------------------------------------------------|---------------------------|---------------------------|
|           |                         | Pre-transfusion                                    | 1 <sup>st</sup> follow-up | 2 <sup>nd</sup> follow-up |
| #         | <i>DEA 1</i> blood type | <i>DEA 1 mismatch</i>                              |                           |                           |
| R9        | - m+                    | -                                                  | ND                        | +                         |
|           | <i>DEA 7</i> blood type | <i>DEA 7 mismatch</i>                              |                           |                           |
| R8        | - +                     | -                                                  | ND                        | +                         |
| R10       | - +                     | -                                                  | -                         | +                         |
| R13       | - +                     | -                                                  | +                         | +                         |
|           | + +                     | -                                                  | +                         | +                         |
| R15       | - +                     | -                                                  | +                         | +                         |
| R18       | - +                     | -                                                  | ND                        | -                         |

*DEA, Dog Erythrocyte Antigen.*

Typing results: -, negative; +, positive; ND, not determined

m+, moderately *DEA 1*+

Crossmatch results: -, compatible; +, incompatible; ND, not determined

#R9 received accidentally *DEA 1* mismatched blood

1<sup>st</sup> follow-up 11-22 days (median 16)

2<sup>nd</sup> follow-up 26-129 days (median 39)
